# Supplementary material
Source: ML conference proceedings conference paper supplement (https://proceedings.mlr.press/v119/kamath20a.html)
Supplement: Supplementary file [file kamath20a-supp.pdf]

## A. Trigonometric identity

**Fact A.1.**

$$\frac{\sin(\beta + \frac{\alpha}{2} - \theta)}{\sin(\alpha/2)} - \frac{\sin(\beta - \theta)}{\sin(\alpha)} = \frac{\sin(\beta - \theta + \alpha)}{\sin(\alpha/2)}$$

*Proof.*

$$\begin{aligned} & \frac{\sin(\beta + \frac{\alpha}{2} - \theta)}{\sin(\alpha/2)} - \frac{\sin(\beta - \theta)}{\sin(\alpha)} \\ &= \frac{\sin(\beta + \frac{\alpha}{2} - \theta) \sin(\alpha) - \sin(\beta - \theta) \sin(\alpha/2)}{\sin(\alpha) \sin(\alpha/2)} \\ &= \frac{1}{2 \sin(\alpha) \sin(\frac{\alpha}{2})} \left( \cos(\beta - \theta - \frac{\alpha}{2}) \right. \\ & \quad \left. - \cos(\beta - \theta + \frac{3\alpha}{2}) \right) \\ &= \frac{\cos(\beta - \theta - \frac{\alpha}{2}) + \cos(\beta - \theta + \frac{\alpha}{2})}{2 \sin(\alpha) \sin(\alpha/2)} \\ &= \frac{\sin(\beta - \theta + \alpha) \sin(\alpha)}{\sin(\alpha) \sin(\alpha/2)} \\ &= \frac{\sin(\beta - \theta + \alpha)}{\sin(\alpha/2)} \end{aligned}$$

where we use the identity that  $\sin(A) \sin(B) = \frac{1}{2}[\cos(A - B) - \cos(A + B)]$   $\square$

## B. Low Width Neural Network for Sparse Vectors

### B.1. Theorems

**Lemma B.1.** *Suppose  $\alpha < \frac{1}{n^{8k}}$ , then with high probability, for all  $S, S' \subseteq [n]$  such that  $|S| = |S'| = k$ ,*

$$\|w_S - w_{S'}\|_2 \leq \alpha^{\frac{1}{4}}$$

*Proof.* Consider a fixed set  $S \subseteq [n]$  such that  $|S| = k$ . Now for any  $S' \neq S$  such that  $|S'| = k$ , consider the set  $T' = S' \setminus S$ .

$$\begin{aligned} \Pr[\|w_S - w_{S'}\|_2 \leq \alpha^{\frac{1}{4}}] &\leq \Pr[\forall i \in T', w_S \in W_i] \\ &= \prod_{i \in T'} \Pr[w_S \in W_i] \\ &= \alpha^{|T'|/4} \end{aligned}$$

So, then the probability that there exists a set  $S'$  such that

$w'_S$  is close is given by:

$$\begin{aligned} \Pr[\exists S' : \|w_S - w_{S'}\|_2 \leq \alpha^{\frac{1}{4}}] &\leq \sum_{\substack{S' \subseteq [n] \\ |S'|=k, S' \neq S}} \alpha^{|S' \setminus S|/4} \\ &= \sum_{i=1}^k \binom{k}{i} \binom{n-k}{i} \alpha^i \\ &\leq (nk\alpha^{\frac{1}{4}}) \end{aligned}$$

where the last inequality follows because  $\alpha < 1/nk$ . Now, applying a union bound over all choices of  $S$ , we get

$$\begin{aligned} \Pr[\exists S, S' : \|w_S - w_{S'}\|_2 \leq \alpha] &\leq \binom{n}{k} \times (nk\alpha^{\frac{1}{4}}) \\ &\leq 1/n^k \end{aligned}$$

$\square$

**Lemma B.2.** *Suppose  $\alpha < \frac{1}{n^{8k}}$ , then given  $S_1, S_2 \subseteq [n]$ , such that  $|S_1| = |S_2| = k$  and  $|S_1 \cap S_2| = l$ ,*

$$W_{S_1} \cap W_{S_2} = \emptyset$$

with probability  $1 - 1/n^{6k}$

*Proof.* Let us denote  $R = \|w_{S_1} - w_{S_2}\|_2$ . We know from Lemma B.1 that with high probability  $\|w_{S_1} - w_{S_2}\|_2 \geq \alpha^{1/4}$ .

Since  $\tan(\alpha) \approx \alpha$  when  $\alpha$  is small, we will substitute  $\alpha$  in place of  $\tan(\alpha)$ .

Let  $V'_S$  denote a matrix whose rows consist of  $\{v'_i \mid i \in S\}$ . Observe that  $W_{S_1} \cap W_{S_2} = \emptyset$  is equivalent to stating that

$$\nexists x \in \mathbb{S}^k : \|V'_{S_1} x\|_\infty < \alpha \wedge \|V'_{S_2} x\|_\infty < \alpha \quad (4)$$

Consider an  $\epsilon$ -net  $N$  over  $\mathbb{S}^k$  where  $\epsilon = \alpha$ . If the above guarantee holds with  $2\alpha$  when restricted to points in  $N$ , then for any element  $x \in \mathbb{S}^k$ , if  $p \in N$  is the element closest to  $x$ , we have a  $b \in \{1, 2\}$  for which we know that  $\|V'_{S_b} p\|_\infty \geq 2\alpha$ . Hence

$$\begin{aligned} \|V'_{S_b} x\|_\infty &\geq \|V'_{S_b} p\|_\infty - \|V'_{S_b}(x - p)\|_\infty \\ &\geq 2\alpha - \epsilon \\ &\geq \alpha \end{aligned}$$

So, we prove that

$$\nexists x \in N : \|V'_{S_1} x\|_\infty < \alpha \wedge \|V'_{S_2} x\|_\infty < \alpha \quad (5)$$

We split this into two cases.

**Case 1: Points close to either  $W_{S_1}$  or  $W_{S_2}$**

Consider the set  $T^{(1)} = \{x \in N \mid \|x - w_{S_1}\|_2 \leq$

$R/2\}$ . We can partition this into sets  $T_i^{(1)} = \{x \in N \mid \|x - w_{S_1}\|_2 \in [2^{i-1}\epsilon, 2^i\epsilon]\}$  for  $i \in [1, \log(R/\epsilon)]$ , and  $T_0^{(1)} = \{x \in N \mid \|x - w_{S_1}\|_2 < \epsilon\}$ .

Observe that for any point  $x \in T_r^{(1)}$ ,

$$\begin{aligned} & \Pr \left[ \|V'_{S_1}(x - w_{S_1})\|_\infty < \alpha \wedge \|V'_{S_2}(x - w_{S_2})\|_\infty < \alpha \right] \\ &= \Pr \left[ \|V'_{S_1}(x - w_{S_1})\|_\infty < \alpha \mid \|V'_{S_2}(x - w_{S_2})\|_\infty < \alpha \right] \\ & \cdot \Pr \left[ \|V'_{S_2}(x - w_{S_2})\|_\infty < \alpha \right] \\ &\leq \left( \frac{\alpha}{\|x - w_{S_1}\|_2} \right)^{k-l} \left( \frac{\alpha}{\|x - w_{S_2}\|_2} \right)^k \\ &\leq \left( \frac{\alpha}{r} \right)^{k-l} \left( \frac{2\alpha}{R} \right)^k \\ &= \frac{2^k \alpha^{2k-l}}{r^{k-l} R^k} \end{aligned}$$

Since the  $|T_r^{(1)}| \leq (r/\epsilon)^k$  (by a volume argument):

$$\begin{aligned} & \Pr \left[ \exists x \in T_r^{(1)} : \right. \\ & \quad \left. \|V'_{S_1}(x - w_{S_1})\|_\infty < \alpha \wedge \|V'_{S_2}(x - w_{S_2})\|_\infty < \alpha \right] \\ & \leq \left( \frac{2^k \alpha^{2k-l}}{\epsilon^k R^{k-l}} \right) \end{aligned}$$

So, if we take a union bound over the  $r = 1, \dots, \log(R/\epsilon)$  values, we get

$$\begin{aligned} & \Pr \left[ \exists x \in T^{(1)} : \right. \\ & \quad \left. \|V'_{S_1}(x - w_{S_1})\|_\infty < \alpha \wedge \|V'_{S_2}(x - w_{S_2})\|_\infty < \alpha \right] \\ & \leq \log(R/\epsilon) \left( \frac{2^k \alpha^{2k-l}}{\epsilon^k R^{k-l}} \right) \end{aligned}$$

We can similarly show this for every  $x \in T^{(2)}$ .

$$\begin{aligned} & \Pr \left[ \exists x \in T^{(2)} : \right. \\ & \quad \left. \|V'_{S_1}(x - w_{S_1})\|_\infty < \alpha \wedge \|V'_{S_2}(x - w_{S_2})\|_\infty < \alpha \right] \\ & \leq \log(R/\epsilon) \left( \frac{2^k \alpha^{2k-l}}{\epsilon^k R^{k-l}} \right) \end{aligned}$$

**Case 2: Points close to neither  $W_{S_1}$  nor  $W_{S_2}$**  Let  $T' = \{x \in N \mid \|x - w_{S_1}\|_2 > R/2 \wedge \|x - w_{S_1}\|_2 > R/2\}$ . We partition  $T'$  into the sets  $T'_0, T'_1, \dots$ .

Consider  $T'_0 = \{x \in N \mid \|x - w_{S_1}\|_2 \geq R/2 \wedge \|x - w_{S_2}\|_2 \geq R/2 \wedge \|x - ((w_{S_1} + w_{S_2})/2)\|_2 \leq R\}$ .

For any point  $x \in T'_0$ :

$$\begin{aligned} & \Pr \left[ \|V'_{S_1}(x - w_{S_1})\|_\infty < \alpha \wedge \|V'_{S_2}(x - w_{S_2})\|_\infty < \alpha \right] \\ &= \Pr \left[ \|V'_{S_1}(x - w_{S_1})\|_\infty < \alpha \right] \\ & \quad \cdot \Pr \left[ \|V'_{S_2}(x - w_{S_2})\|_\infty < \alpha \right] \\ &= \left( \frac{\alpha}{\|x - w_{S_1}\|_2} \right)^k \left( \frac{\alpha}{\|x - w_{S_2}\|_2} \right)^{k-l} \\ &\leq \left( \frac{2\alpha}{R} \right)^k \left( \frac{2\alpha}{R} \right)^{k-l} \\ &= \left( \frac{2\alpha}{R} \right)^{2k-l} \end{aligned}$$

and since  $|T'_0| \approx (R/\epsilon)^k$ , we can conclude

$$\begin{aligned} & \Pr \left[ \exists x \in T'_0 : \right. \\ & \quad \left. \|V'_{S_1}(x - w_{S_1})\|_\infty < \alpha \wedge \|V'_{S_2}(x - w_{S_2})\|_\infty < \alpha \right] \\ & \leq \frac{(2\alpha)^{2k-l}}{\epsilon^k R^{k-l}} \end{aligned}$$

Define  $T'_i = \{x \in \mathbb{S}^k \mid \|x - ((w_{S_1} + w_{S_2})/2)\|_2 \in [2^{i-1}R, 2^iR]\}$ . For any  $x \in T'_i$ ,

$$\begin{aligned} & \Pr \left[ \|V'_{S_1}(x - w_{S_1})\|_\infty < \alpha \wedge \|V'_{S_2}(x - w_{S_2})\|_\infty < \alpha \right] \\ & \leq \left( \frac{\alpha}{\|x - w_{S_1}\|_2} \right)^k \left( \frac{\alpha}{\|x - w_{S_2}\|_2} \right)^k \\ & \leq \left( \frac{\alpha}{2^{i-1}R} \right)^k \left( \frac{2\alpha}{2^{i-1}R} \right)^{k-l} \\ & = \left( \frac{8\alpha}{2^i R} \right)^{2k-l} \end{aligned}$$

So, taking a union bound over all points in  $T'_i$ , we have:

$$\begin{aligned} & \Pr \left[ \exists x \in T'_i : \right. \\ & \quad \left. \|V'_{S_1}(x - w_{S_1})\|_\infty < \alpha \wedge \|V'_{S_2}(x - w_{S_2})\|_\infty < \alpha \right] \\ & \leq \left( \frac{2^i R}{\epsilon} \right)^k \left( \frac{4\alpha}{2^i R} \right)^{2k-l} \\ & = \frac{(8\alpha)^{2k-l}}{(2^i R)^{k-l} \epsilon^k} \end{aligned}$$

So, bounding over all partitions of  $T'$ , we get:

$$\begin{aligned} & \Pr \left[ \exists x \in T' : \right. \\ & \quad \left. \|V'_{S_1}(x - w_{S_1})\|_\infty < \alpha \wedge \|V'_{S_2}(x - w_{S_2})\|_\infty < \alpha \right] \\ & \leq \sum_{i=0}^{\infty} \frac{(4\alpha)^{2k-l}}{(2^i R)^{k-l} \epsilon^k} \\ & \leq \frac{(8\alpha)^{2k-l}}{R^{k-l} \epsilon^k} \end{aligned}$$

So, (5) holds with probability:

$$\begin{aligned} \Pr \left[ \exists x \in N : \right. \\ \left. \|V'_{S_1}(x - w_{S_1})\|_\infty < \alpha \wedge \|V'_{S_2}(x - w_{S_2})\|_\infty < \alpha \right] \\ \leq \log(R/\epsilon) \left( \frac{2^k \alpha^{2k-l}}{\epsilon^k R^{k-l}} \right) \\ \leq \log(R/\epsilon) \left( \frac{2^k \alpha^{2k-l}}{\alpha^k \alpha^{k-l/4}} \right) \\ = \log(R/\epsilon) 2^k \alpha^{3(k-l)/4} \end{aligned}$$

Since  $\log(R/\epsilon) \approx k \log(n)$  and  $\alpha^{3(k-l)/4} < \frac{1}{n^{6k}}$ , this is bounded by  $\frac{1}{n^{6k}}$ . Further, because of the argument which showed that (5) implies (4), up to a factor 2 scaling of  $\alpha$ , we get that:

$$\begin{aligned} \Pr \left[ \exists x \in \mathbb{S}^k : \right. \\ \left. \|V'_{S_1}(x - w_{S_1})\|_\infty < \alpha \wedge \|V'_{S_2}(x - w_{S_2})\|_\infty < \alpha \right] \\ \leq 1/n^{6k} \end{aligned}$$

□

**Lemma B.3.** Suppose  $\alpha < \frac{1}{n^{8k}}$ , for all sets,  $S_1, S_2 \subseteq [n]$ , such that  $|S_1| = |S_2| = k$ ,

$$W_{S_1} \cap W_{S_2} = \emptyset$$

with probability  $1 - 1/n^{3k}$

*Proof.* For any two sets  $S_1$  and  $S_2$  such that the  $S_1 \setminus S_2 = l$ , we know that:

$$W_{S_1} \cap W_{S_2} = \emptyset$$

with probability  $\geq 1 - \alpha^{3/4}$ . So, for a given set  $S_1$ ,

$$\begin{aligned} \Pr \left[ \exists S \subseteq [n], |S| = k : W_{S_1} \cap W_S \neq \emptyset \right] \\ \leq \sum_{i=1}^k \binom{k}{i} \binom{n-k}{i} \alpha^{3/4} \\ \leq n^{2k} \alpha^{3/4} \end{aligned}$$

Further, taking a union bound over all choices of  $S$ , we get

$$\begin{aligned} \Pr \left[ \exists S_1 \neq S_2 \subseteq [n], |S_1| = |S_2| = k : W_{S_1} \cap W_{S_2} \neq \emptyset \right] \\ \leq \binom{n}{k} n^{2k} \alpha^{3/4} \\ \leq n^{3k} \alpha^{3/4} \\ \leq 1/n^{3k} \end{aligned}$$

□

*Proof. of Theorem 2.2* Let  $y \in \mathbb{R}^n$  be a  $k$ -sparse vector and let  $S = \{i \in [n] \mid y_i \neq 0\}$ . From Lemma B.1 and Lemma B.3, we know that there exists a point  $w_S$  such that  $G(w_S)$  is non-zero at exactly the points  $\{i \in [n] \mid y_i \neq 0\}$ .

Consider the polytope on  $\mathbb{S}^k$  defined by  $W_S$  which contains  $w_S$ . As illustrated in Figure 1, each  $F_i$  partitions each  $W_S$  into 2 linear regions. So, there exist  $2^k$  polytopes which within  $W_S$  such that for each polytope,  $w_S$  is a vertex. Consider one such polytope  $P$  defined by  $\langle x, \alpha v'_i + v_i \rangle > 0$  and  $\langle x, v_i \rangle \leq 0$ .

Let  $x_0$  be the point in  $P$  such that  $\langle x_0, v_i + \alpha v'_i \rangle = 0$  for all  $i \in S$ . Let  $\langle x_0, v_i \rangle = -r_i$  for each  $i \in S$  and define  $r = \frac{1}{2} \min_{i \in S} r_i$ .

Now, solve for  $\delta$  such that  $\langle \delta, v_i + \alpha v'_i \rangle = |y_i| / \|y\|_2 r$  for all  $i \in S$ . Observe that for such a  $\delta$ :

$$\begin{aligned} \langle x + \delta, v_i \rangle &= \langle x, v_i \rangle + \langle \delta, v_i \rangle \\ &= -r_i + \langle \delta, v_i \rangle \\ &\leq -r_i + \|\delta\|_2 \cdot \|v_i\|_2 \\ &\leq -r_i/2 \end{aligned}$$

So,  $x + \delta$  lies within  $P$  and  $G(x + \delta)_i = y_i / \|y\|_2 r$ . So, since  $G(a \cdot x) = a \cdot G(x)$ , we have:

$$G(\|y\|_2 \cdot r \cdot (x + \delta)) = y$$

□
